# Supplementary material for: A reconstruction of Iberia accounting for Western Tethys–North Atlantic kinematics since the late-Permian–Triassic
Source: Copernicus journal article supplement (doi:10.5194/se-11-1313-2020), 2020-07-21
Supplement: Supplementary file 1 [file se-11-1313-2020-supplement.zip]

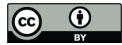

## *Supplement of*

# **A reconstruction of Iberia accounting for Western Tethys–North Atlantic kinematics since the late-Permian–Triassic**

**Paul Angrand et al.**

*Correspondence to:* Paul Angrand ([paul.angrand.geology@gmail.com](mailto:paul.angrand.geology@gmail.com))

- [se-11-1313-2020-supplement-title-page.pdf](#)
- Angrand\_et\_al\_SUPPLEMENTS
  - .DS\_Store
  - Angrand\_et\_al\_Supp.Mat.docx
  - SM1\_Aquitaine\_Basin.pdf
  - SM2\_Betics.pdf
  - SM4\_Maestrat.pdf
  - SM5\_West\_Iberia.pdf
  - SM6\_GPlates\_model\_Angrand\_data
    - \* .DS\_Store
    - \* Coastlines\_Angrand.gpmlz
    - \* Cont\_polygons\_Angrand.gpml
    - \* EM\_topologies\_Angrand.gpml
    - \* ExhumedMantle\_Angrand.gpml
    - \* LaLOC\_Angrand.gpml
    - \* Motionpaths\_301\_Angrand.gpml
    - \* Oceanic\_polygons\_Angrand.gpml
    - \* Oceanic\_topologies\_Angrand.gpml
    - \* RECC\_Angrand.gpml
    - \* ReconstructionPoints\_Angrand.gpml
    - \* Rotation\_ANGRAND\_UPDATED\_270-100\_Final.rot
    - \* Subductions\_topologies\_Angrand.gpml
  - SM7\_Animated\_reconstruction.mpeg

The copyright of individual parts of the supplement might differ from the CC BY 4.0 License.
